# Supplementary material for: Vertical Trapping of the Coffee Berry Borer, Hypothenemus hampei (Coleoptera: Scolytinae), in Coffee
Source: MDPI journal article supplement (doi:10.3390/insects12070607), 2021-07-02
Supplement: s1 [file s1]

# Vertical Trapping of the Coffee Berry Borer, *Hypothenemus hampei* (Coleoptera: Scolytinae), in Coffee

Claudia Patricia Ruiz-Diaz and José Carlos Verle Rodrigues \*

## Supplementary Materials

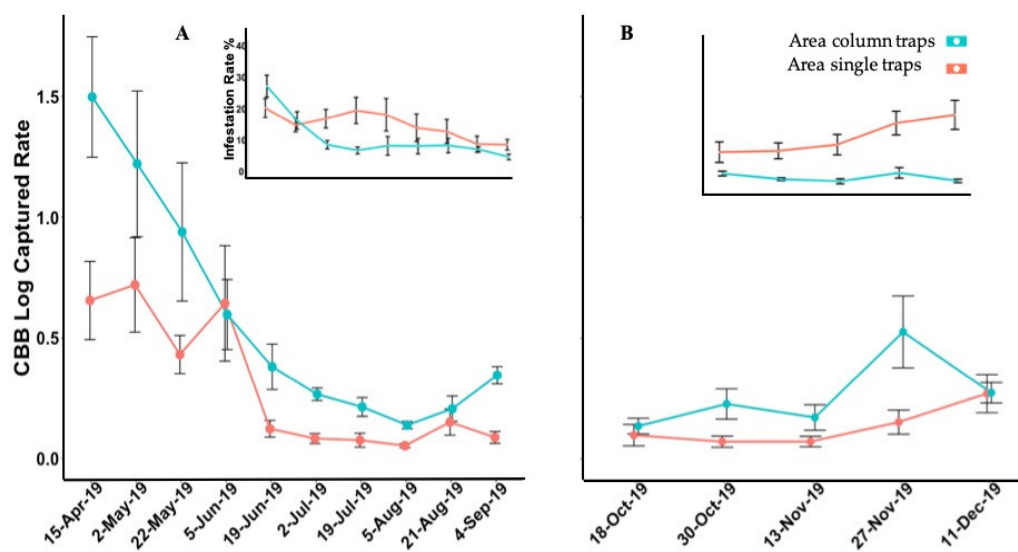

**Figure S1:** Comparison of traps placed at 1.5 m in the single (red) and in the column trap design (blue) showing the top insert, infestation rate of the coffee berries in the Experiment A and B plots (red) and berry infestation rate in the referential single trap plots (blue).

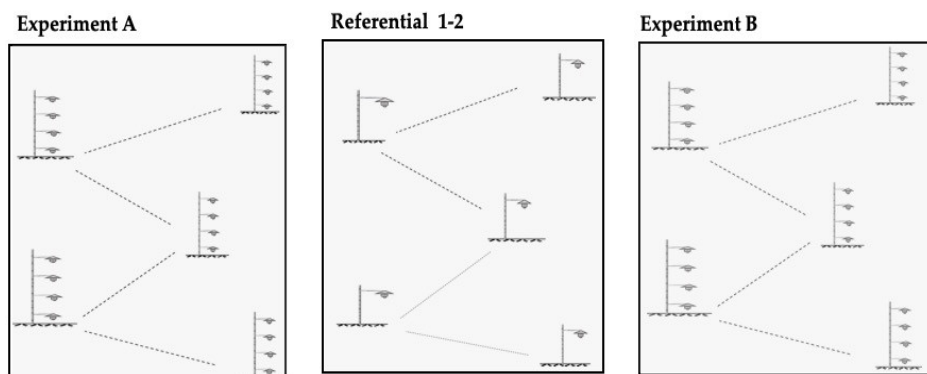

**Figure S2:** Schematic design of traps in zigzag disposition in different selected coffee plots. The referential plot was the same for both experiments. Experiment A was carried out between March and September 2019 and Experiment B between October and March 2020 at the Agricultural Experiment Station in Adjuntas, University of Puerto Rico.

**Table S1:** Analysis of variance of column traps in Experiment A and Experiment B.

| <b>Experiment A</b>      |    |                    |
|--------------------------|----|--------------------|
|                          | df | Pr(>Chi)           |
| Trap Height              | 3  | $<2.2e^{-16}$ ***  |
| Date Sampler             | 10 | $7.867e^{-11}$ *** |
| Trap Height: Date Sample | 30 | $<2.2e^{-16}$ ***  |
| <b>Experiment B</b>      |    |                    |
|                          | df | Pr(>Chi)           |
| Trap Height              | 3  | $<2.2e^{-16}$ ***  |
| Date Sampler             | 7  | 0.0814435          |
| Trap Height: Date Sample | 21 | 0.0001252 ***      |
